# Supplementary material for: Engineering ketoreductases for the enantioselective synthesis of chiral alcohols
Source: Royal Society of Chemistry journal article supplement (doi:10.1039/d3cc01474f), 2023-01-01
Supplement: d3cc01474f1.pdf [file d3cc01474f1.pdf]

**KRED index :**

| Enzymes                       | Substrates                                                                              | Products                                                                                                  | Yields and ee values                                                    | References |
|-------------------------------|-----------------------------------------------------------------------------------------|-----------------------------------------------------------------------------------------------------------|-------------------------------------------------------------------------|------------|
| <i>Lb</i> CRM8                | <i>t</i> -butyl 6-cyano-(5 <i>R</i> )-hydroxy-3-oxo-hexanoate                           | <i>t</i> -butyl 6-cyano-(3 <i>R</i> , 5 <i>R</i> )-dihydroxy hexanoate                                    | 1.05 kg·L <sup>-1</sup> d <sup>-1</sup> STY;<br>>99.5% de               | Ref 25     |
| <i>Ch</i> KRED12              | Ethyl 3-oxo-3-(2-thienyl) propanoate                                                    | ( <i>S</i> )-3-hydroxy-3-(2-thienyl) propanoate                                                           | 289 g·L <sup>-1</sup> d <sup>-1</sup> STY;<br>>99.0% ee                 | Ref 26     |
| <i>Ch</i> KRED20              | 2-chloro-1-(3,4-difluorophenyl)ethanol                                                  | (1 <i>S</i> )-2-chloro-1-(3,4-difluorophenyl) ethanol                                                     | 150 g·L <sup>-1</sup> (6 h);<br>99.0% ee                                | Ref 30     |
| <i>Cg</i> KR1-F92C/F94W       | <i>t</i> -butyl 3-oxopiperidine-1-carboxylate                                           | ( <i>S</i> )- <i>N</i> -Boc-3-hydroxypiperidine                                                           | 583 g·L <sup>-1</sup> d <sup>-1</sup> STY;<br>99.0% ee                  | Ref 29     |
| <i>Cg</i> KR1 mutants         | <i>N</i> -ethyl- <i>N</i> -methyl-2-(3-oxo-2,3-dihydro-1 <i>H</i> -inden-5-yl)acetamide | ( <i>S</i> )- <i>N</i> -ethyl-2-(3-hydroxy-2,3-dihydro-1 <i>H</i> -inden-5-yl)- <i>N</i> -methylacetamide | >99.9% ee                                                               | Ref 32     |
| <i>Rt</i> SCR9                | ( <i>S</i> )-6-chloro-5-hydroxy-3-oxohexanoate                                          | <i>tert</i> -butyl (3 <i>R</i> , 5 <i>S</i> )-6-chloro-3,5-dihydroxyhexanoate                             | 753 mmol·L <sup>-1</sup> h <sup>-1</sup> g <sup>-1</sup> ;<br>>99% ee   | Ref 76     |
| <i>Ss</i> CRL211H/V127A/L135I | Methyl 8-chloro-6-oxooctanoate                                                          | Methyl ( <i>R</i> )-8-chloro-6-hydroxyoctanoate                                                           | 391 g·L <sup>-1</sup> ·d <sup>-1</sup> STY;<br>98.0%                    | Ref 34     |
| <i>Ss</i> CR                  | 2-chloro-1-(2,4-dichlorophenyl)ethanol                                                  | ( <i>R</i> )-2-chloro-1-(2,4-dichlorophenyl)ethanol                                                       | 268 g·L <sup>-1</sup> d <sup>-1</sup> STY;<br>99.9% ee                  | Ref 118    |
| <i>Cp</i> AR2S131Y/Q252I      | Ethyl 8-chloro-6-oxooctanoate                                                           | ( <i>R</i> )-8-chloro-6-hydroxyoctanoic acid                                                              | 566 g·L <sup>-1</sup> d <sup>-1</sup> STY;<br>>99%                      | Ref 63     |
| KIAKR-Y295W/W296L             | <i>t</i> -butyl 6-cyano-(5 <i>R</i> )-hydroxy-3-oxohexanoate                            | <i>t</i> -butyl 6-cyano-(3 <i>R</i> , 5 <i>R</i> )-dihydroxyhexanoate                                     | >99.5% de                                                               | Ref 65     |
| <i>Km</i> AKRM9               | <i>t</i> -butyl 6-cyano-(5 <i>R</i> )-hydroxy-3-oxohexanoate                            | <i>t</i> -Butyl 6-cyano-(3 <i>R</i> ,5 <i>R</i> )-dihydroxyhexanoate                                      | 1.8kg·L <sup>-1</sup> d <sup>-1</sup> STY;<br>>99.5% de                 | Ref 70     |
| <i>Lf</i> SDR1-V186A/E141I    | 1-(3-ethoxy-4-methoxyphenyl)-2-(methylsulfonyl)ethanol                                  | ( <i>R</i> )-1-(3-ethoxy-4-methoxyphenyl)-2-(methylsulfonyl)ethanol                                       | 99.2% ee                                                                | Ref 114    |
| <i>Rt</i> SCR9                | 3-(dimethylamino)-1-(thiophen-2-yl)propan-1-one                                         | ( <i>S</i> )-3-(dimethylamino)-1-(2-thienyl)-1-propanol                                                   | 22.9 mmol·L <sup>-1</sup> h <sup>-1</sup> g <sup>-1</sup> ;<br>99.9% ee | Ref 128    |
| <i>Ch</i> KRED15              | Ethyl 3-oxo-3-(2-thienyl) propanoate                                                    | ( <i>S</i> )-3-hydroxy-3-(2-thienyl) propanoate                                                           | 289 g·L <sup>-1</sup> d <sup>-1</sup> STY;<br>>99% ee                   | Ref 129    |

|               |                |                                  |                                          |                                                            |         |
|---------------|----------------|----------------------------------|------------------------------------------|------------------------------------------------------------|---------|
| <i>CorCPR</i> |                | Ketopantolactone                 | D-(-)-Pantolactone                       | 2.1 g·h <sup>-1</sup> g <sup>-1</sup> DCW;<br>>99% ee      | Ref 132 |
| Tm1743        | W21L/W<br>118H | Ethyl 2-oxo-4-<br>phenylbutyrate | Ethyl (S)-2-hydroxy-4-<br>phenylbutyrate | 99.6% ee                                                   | Ref 88  |
|               | W21S/W<br>86E  |                                  | Ethyl (R)-2-hydroxy-4-<br>phenylbutyrate | 99.4% ee                                                   |         |
| <i>LcSDR</i>  |                | Acetophenone                     | (R)-1-phenylethanol                      | 562.8 g L <sup>-1</sup> d <sup>-1</sup><br>STY;<br>>99% ee | Ref 98  |
